# Supplementary material for: Bacteriophage vB_SepP_134 and Endolysin LysSte_134_1 as Potential Staphylococcus-Biofilm-Removing Biological Agents
Source: MDPI journal article supplement (doi:10.3390/v16030385), 2024-02-29
Supplement: s1 [file s1]

Table S1. *Staphylococcus* spp. strains sensitive to the St\_134 phage

| No                                                                               | CEMTC*<br>number | Collection<br>date | Sample<br>source               | Coordinate<br>s          | Antibi<br>otic<br>resista<br>nce | Aminoglycosides | $\beta$ -lactams | Fluoroquinolones | Glycopeptides | Lincosamides | Macrolides | Oxazolidinones | Phenicol | Sulfonamides | Tetracyclines | GenBank<br>Accession<br>number |
|----------------------------------------------------------------------------------|------------------|--------------------|--------------------------------|--------------------------|----------------------------------|-----------------|------------------|------------------|---------------|--------------|------------|----------------|----------|--------------|---------------|--------------------------------|
| <b><i>S. aureus</i> complex (<i>S. roterodami</i>/<i>S. argenteus</i>) (1/1)</b> |                  |                    |                                |                          |                                  |                 |                  |                  |               |              |            |                |          |              |               |                                |
| 1                                                                                | 3692             | May 2019           | periprosthetic joint infection | 55°02'15"N<br>82°55'39"E | S                                |                 |                  |                  |               |              |            |                |          |              |               | OR856624                       |
| <b><i>S. auricularis</i> (1/5)</b>                                               |                  |                    |                                |                          |                                  |                 |                  |                  |               |              |            |                |          |              |               |                                |
| 2                                                                                | 2738             | Sep 2016           | ear swab                       | 54°51'02"N<br>83°06'16"E | R                                |                 |                  |                  |               | DA           |            |                |          |              |               | MZ014399                       |
| <b><i>S. capitis</i> (4/4)</b>                                                   |                  |                    |                                |                          |                                  |                 |                  |                  |               |              |            |                |          |              |               |                                |
| 3                                                                                | 1590             | Apr-2013           | urine                          | 54°51'02"N<br>83°06'16"E | S                                |                 |                  |                  |               |              |            |                |          |              |               | MZ014405                       |
| 4                                                                                | 1680             | Nov-2011           | nasal swab                     | 54°51'02"N<br>83°06'16"E | S                                |                 |                  |                  |               |              |            |                |          |              |               | MZ014406                       |
| 5                                                                                | 2904             | Feb-2017           | ear swab                       | 54°51'02"N<br>83°06'16"E | S                                |                 |                  |                  |               |              |            |                |          |              |               | MZ014411                       |
| 6                                                                                | 3590             | Jan-2019           | skin                           | 54°51'02"N<br>83°06'16"E | S                                |                 |                  |                  |               |              |            |                |          |              |               | MZ014407                       |
| <b><i>S. caprae</i> (5/5)</b>                                                    |                  |                    |                                |                          |                                  |                 |                  |                  |               |              |            |                |          |              |               |                                |
| 7                                                                                | 1849             | Apr-2014           | skin, auricle                  | 54°51'02"N<br>83°06'16"E | S                                |                 |                  |                  |               |              |            |                |          |              |               | MZ014408                       |
| 8                                                                                | 2305             | Dec-2015           | periprosthetic joint infection | 55°02'15"N<br>82°55'39"E | S                                |                 |                  |                  |               |              |            |                |          |              |               | MZ014409                       |
| 9                                                                                | 2739             | Sep-2016           | skin, auricle                  | 54°51'02"N<br>83°06'16"E | S                                |                 |                  |                  |               |              |            |                |          |              |               | MZ014410                       |
| 10                                                                               | 3411             | Jun-2018           | skin                           | 54°51'02"N<br>83°06'16"E | S                                |                 |                  |                  |               |              |            |                |          |              |               | MZ014412                       |
| 11                                                                               | 3440             | Aug-2018           | skin, psoriasis                | 54°51'02"N<br>83°06'16"E | S                                |                 |                  |                  |               |              |            |                |          |              |               | MZ014413                       |
| <b><i>S. casei</i> (2/2)</b>                                                     |                  |                    |                                |                          |                                  |                 |                  |                  |               |              |            |                |          |              |               |                                |
| 12                                                                               | 1626             | Apr-2013           | feces                          | 54°51'02"N<br>83°06'16"E | S                                |                 |                  |                  |               |              |            |                |          |              |               | MZ014416                       |
| 13                                                                               | 2931**           | Mar-2017           | guinea pig, oral cavity        | 54°56'20"N<br>83°11'00"E | S                                |                 |                  |                  |               |              |            |                |          |              |               | MW979954                       |
| <b><i>S. coagulans</i> (1/8)</b>                                                 |                  |                    |                                |                          |                                  |                 |                  |                  |               |              |            |                |          |              |               |                                |
| 14                                                                               | 3359**           | Mar-2018           | skin, dog                      | 54°58'38"N<br>83°02'42"E | S                                |                 |                  |                  |               |              |            |                |          |              |               | MW979970                       |
| <b><i>S. cohnii</i> (2/5)</b>                                                    |                  |                    |                                |                          |                                  |                 |                  |                  |               |              |            |                |          |              |               |                                |
| 15                                                                               | 2687             | Jul-2016           | feces                          | 55°02'06"N<br>82°55'56"E | S                                |                 |                  |                  |               |              |            |                |          |              |               | MZ014418                       |
| 16                                                                               | 3694**           | May-2019           | chicken poop                   | 52°46'N<br>82°37'E       | S                                |                 |                  |                  |               |              |            |                |          |              |               | MW969510                       |
| <b><i>S. devriesei</i> (1/4)</b>                                                 |                  |                    |                                |                          |                                  |                 |                  |                  |               |              |            |                |          |              |               |                                |
| 17                                                                               | 700              | Apr-2010           | urine                          | 54°51'02"N<br>83°06'16"E | R                                |                 |                  |                  |               |              | E          |                |          |              |               | MZ014419                       |
| <b><i>S. epidermidis</i> (33/132) 25%</b>                                        |                  |                    |                                |                          |                                  |                 |                  |                  |               |              |            |                |          |              |               |                                |
| 18                                                                               | 301              | Jul-2009           | skin, outpatient               | 55°03'N<br>82°57'E       | S                                |                 |                  |                  |               |              |            |                |          |              |               | OR856620                       |
| 19                                                                               | 1380             | Sep-2011           | dental plaque                  | 54°51'02"N<br>83°06'16"E | S                                |                 |                  |                  |               |              |            |                |          |              |               | MZ049534                       |
| 20                                                                               | 1548             | Feb-2013           | diabetic                       | 55°02'13"N               | R                                |                 | FOX              |                  |               |              | E          |                |          |              |               | MZ027385                       |

[illegible]

|                                     |        |          |                               |                          |     |           |           |             |  |    |   |  |  |  |  |          |
|-------------------------------------|--------|----------|-------------------------------|--------------------------|-----|-----------|-----------|-------------|--|----|---|--|--|--|--|----------|
| 49                                  | 4465   | Nov-2021 | throat swab                   | 54°51'02"N<br>83°06'16"E | MDR | AK        | FOX       |             |  | DA | E |  |  |  |  |          |
| 50                                  | 6765   | Jun-2022 | urine                         | 55°03'N<br>82°57'E       | R   |           | P,<br>FOX |             |  |    | E |  |  |  |  | OR856632 |
| <i>S. equorum</i> (2/4)             |        |          |                               |                          |     |           |           |             |  |    |   |  |  |  |  |          |
| 51                                  | 3183** | Sep-2017 | cloaca flush, red-headed duck | 53°44'43"N<br>77°52'54"E | S   |           |           |             |  |    |   |  |  |  |  | MW969511 |
| 52                                  | 3636** | Feb-2019 | vaginal smear, dog            | 54°58'38"N<br>83°02'42"E | S   |           |           |             |  |    |   |  |  |  |  | MW979971 |
| <i>S. haemolyticus</i> (3/28) 10.7% |        |          |                               |                          |     |           |           |             |  |    |   |  |  |  |  |          |
| 53                                  | 1437** | Nov-2012 | excrement, chinchilla         | 54°50'57"N<br>83°06'13"E | MDR | CN        | FOX       |             |  |    | E |  |  |  |  | MW979956 |
| 54                                  | 1700   | Dec-2013 | diabetic foot ulcer           | 55°02'13"N<br>82°53'00"E | MDR | CN        | FOX       |             |  |    | E |  |  |  |  | MZ027398 |
| 55                                  | 3413   | Jul-2018 | oral mucosa, ventilation      | 54°51'07"N<br>83°05'29"E | MDR | AK,<br>CN | FOX       |             |  |    | E |  |  |  |  | MZ027399 |
| <i>S. lugdunensis</i> (2/3)         |        |          |                               |                          |     |           |           |             |  |    |   |  |  |  |  |          |
| 56                                  | 4459   | Jul-2021 | nasal swab                    | 54°51'02"N<br>83°06'16"E | R   |           | FOX       |             |  |    |   |  |  |  |  | OQ346157 |
| 57                                  | 4461   | Jul-2021 | nasal swab                    | 54°51'02"N<br>83°06'16"E | S   |           |           |             |  |    |   |  |  |  |  | OQ346157 |
| <i>S. ureilyticus</i> (1/1)         |        |          |                               |                          |     |           |           |             |  |    |   |  |  |  |  |          |
| 58                                  | 1966   | Oct-2014 | skin, crack between fingers   | 54°51'02"N<br>83°06'16"E | MDR |           | P         | CIP,<br>LEV |  | DA |   |  |  |  |  | OQ346151 |

The number of St\_134-sensitive strains among tested strains is indicated in parentheses.

\*– Collection of Extremophile Microorganisms and Type Cultures (CEMTC) of ICBFM SB RAS; \*\*– strains isolated from pets; \*\*\*– host strain for the St\_134 phage.

Abbreviations: MDR – Multi Drug Resistance; R – Resistance; S – Sensitive; AK – Amikacin; C – Chloramphenicol; CIP – Ciprofloxacin, CN – Gentamicin; DA – Clindamycin; FOX – Cefoxitin; E – Erythromycin; LEV – Levofloxacin; LNM – Lincomycin; P – Penicillin; SXT – Trimethoprim/sulfamethoxazole; TE – Tetracycline; VA – Vancomycin.

Table S2. Open reading frames (ORFs) found in the genome of the St\_134 phage

| ORF | Location         | Strand | Function                                   |
|-----|------------------|--------|--------------------------------------------|
| 1   | St_134_131_499   | +      | tail tip protein                           |
| 2   | St_134_516_731   | +      | hypothetical protein                       |
| 3   | St_134_746_1138  | +      | single stranded DNA-binding protein        |
| 4   | St_134_1263_1472 | +      | hypothetical protein                       |
| 5   | St_134_1476_1721 | +      | hypothetical protein                       |
| 6   | St_134_1711_2940 | +      | receptor binding anchor protein; hydrolase |
| 7   | St_134_2951_3454 | +      | 5' terminal protein                        |
| 8   | St_134_3513_4772 | +      | terminase                                  |
| 9   | St_134_4830_7121 | +      | DNA polymerase                             |
| 10  | St_134_8655_7234 | -      | tail tip lysin                             |

---

|    |                    |   |                              |
|----|--------------------|---|------------------------------|
| 11 | St_134_9070_8648   | - | holin                        |
| 12 | St_134_10844_9078  | - | tail knob protein            |
| 13 | St_134_11707_10904 | - | head fiber (Fib)protein      |
| 14 | St_134_12595_11708 | - | endolysin                    |
| 15 | St_134_14461_12632 | - | receptor binding protein     |
| 16 | St_134_15310_14474 | - | tail stem/collar protein     |
| 17 | St_134_16310_15303 | - | portal protein               |
| 18 | St_134_17548_16331 | - | major capsid protein         |
| 19 | St_134_17751_17560 | - | capsid lining protein        |
| 20 | St_134_18084_17764 | - | portal-proximal core protein |

---
