# Supplementary material for: Bacteriophage vB_SepP_134 and Endolysin LysSte_134_1 as Potential Staphylococcus-Biofilm-Removing Biological Agents
Source: MDPI journal article supplement (doi:10.3390/v16030385), 2024-02-29
Supplement: s1 [file s1]

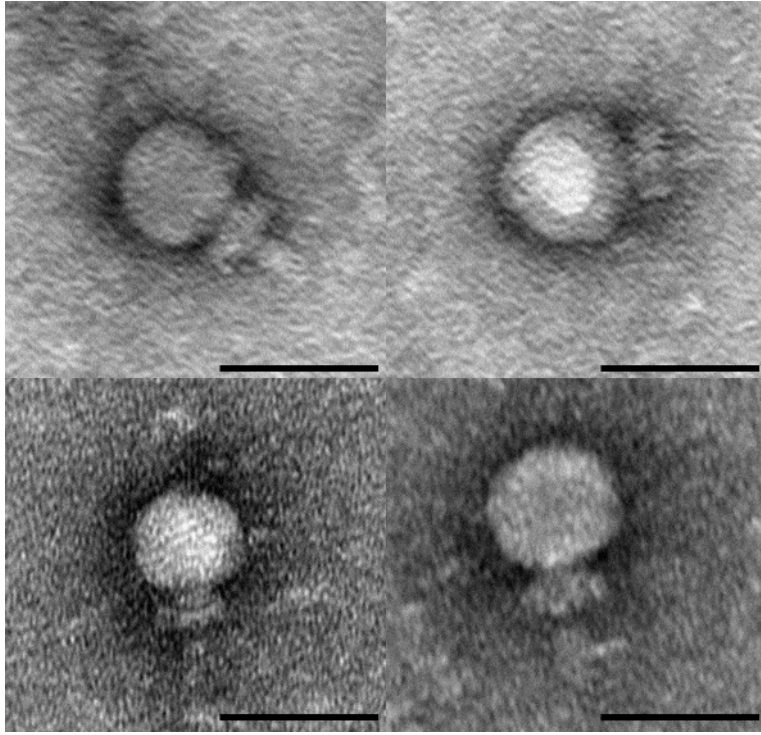

**Figure S1:** Electron micrographs of St\_134 phage particles negatively stained with 1% uranyl acetate. Scale bar was 50 nm.

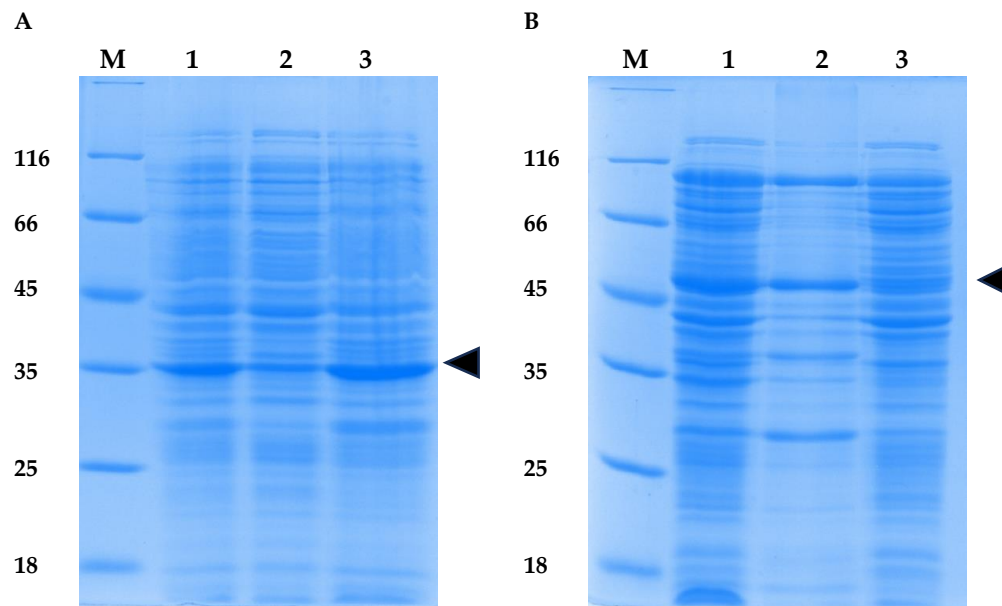

**Figure S2:** SDS PAGE (A): 1 - lysates of *E. coli* M15-pQE-60/LysSte134\_1 cells, producing recombinant LysSte134\_1; 2 – insoluble cytoplasm of *E. coli* M15- pQE-60/LysSte134\_1; 3 –soluble cytoplasm of *E. coli* M15- pQE-60/LysSte134\_1. (B): 1 - lysates of *E. coli* M15-pQE-60/LysSte134\_2 cells, producing recombinant LysSte134\_2; 2 – insoluble cytoplasm of *E. coli* M15- pQE-60/LysSte134\_2; 3 – soluble cytoplasm of *E. coli* M15- pQE-60/LysSte134\_2. M- protein ladder 26610 Pierce <sup>TM</sup> Unstained protein (Thermo Fisher Scientific, Waltham, MA, USA).
